# Supplementary material
Source: publisher site journal article supplement (https://www.spandidos-publications.com/7907/downloadSupplementary)

Figure S1. Histopathology and immunohistochemistry of the resected temporal metastasis, placenta and umbilical cord. (A and B) H&E staining of the left temporal melanoma metastasis (magnification, x200). Immunohistochemistry of the temporal metastasis showing (C) cytokeratin AE1/3(-), (D) S100(+), (E) SOX10(+), (F) melan-A(+), (G) HMB-45(+), (H) preferentially expressed antigen in melanoma(+) results and (I) a Ki-67 proliferation index up to 30% (magnification, x200). (J and K) H&E staining of the placenta showing no metastatic involvement (magnification, x100). (L) H&E staining of the umbilical cord showing no metastatic involvement (magnification, x4). -, negative; +, positive; H&E, hematoxylin and eosin.

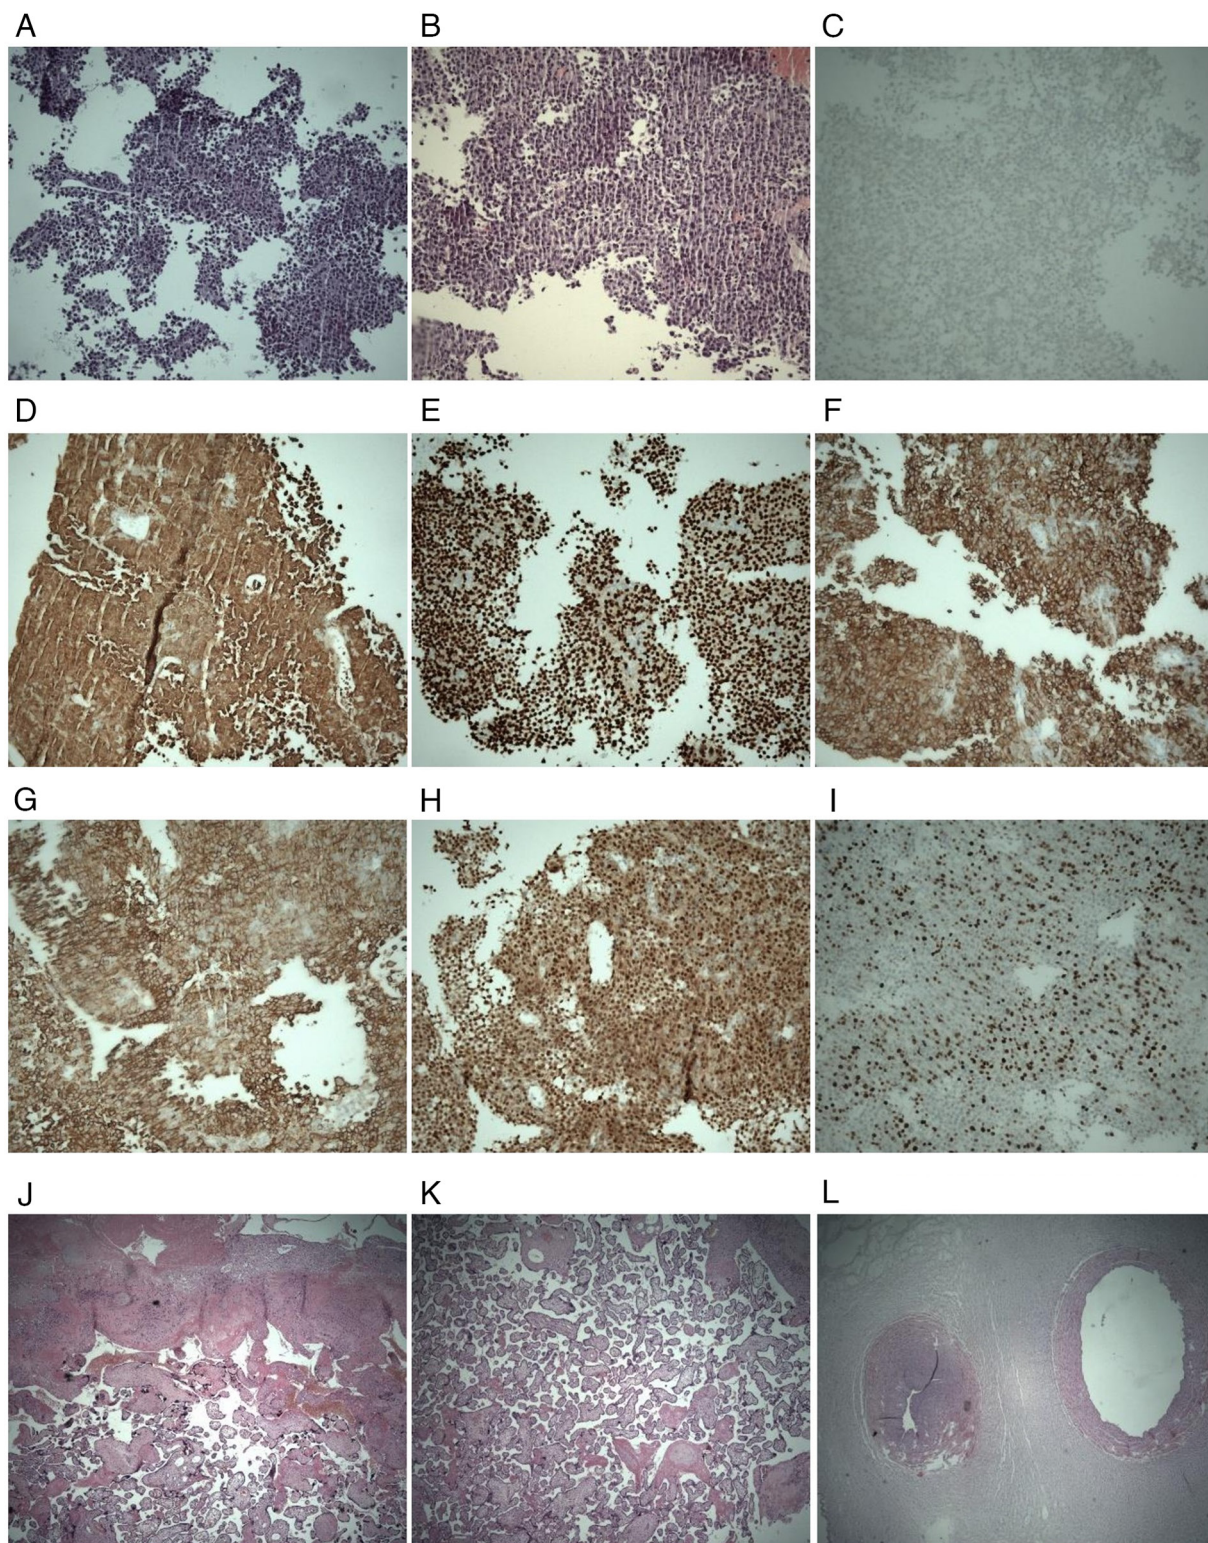

Supplement: Supplementary file [file downloadSupplementary]
